# Supplementary material for: Genome-wide methylation and gene-expression analyses in thalassemia
Source: publisher site journal article supplement (doi:10.18632/aging.206037), 2024-08-09
Supplement: Supplementary file [file aging-v16i15-206037-supplementary-material-SD1.pdf]

## SUPPLEMENTARY TABLES

**Supplementary Table 1. Table of transcriptome sequencing raw data filtering statistics.**

| <b>Sample</b> | <b>RawDats</b> | <b>CleanData(%)</b> | <b>Adapter(%)</b> | <b>LowQuality(%)</b> | <b>polyA(%)</b> | <b>N(%)</b>  |
|---------------|----------------|---------------------|-------------------|----------------------|-----------------|--------------|
| Th1           | 50006004       | 49902462 (99.79%)   | 18724 (0.04%)     | 84640 (0.17%)        | 0 (0.00%)       | 178 (0.00%)  |
| Th2           | 55443846       | 55318884 (99.77%)   | 18758 (0.03%)     | 106046 (0.19%)       | 0 (0.00%)       | 158 (0.00%)  |
| Th3           | 40425602       | 40328798 (99.76%)   | 14374 (0.04%)     | 82310 (0.20%)        | 0 (0.00%)       | 120 (0.00%)  |
| Th4           | 50783392       | 50666806 (99.77%)   | 15442 (0.03%)     | 100984 (0.20%)       | 0 (0.00%)       | 160 (0.00%)  |
| Th6           | 41425714       | 41330790 (99.77%)   | 11046 (0.03%)     | 83752 (0.20%)        | 0 (0.00%)       | 126 (0.00%)  |
| Th7           | 48321188       | 48208000 (99.77%)   | 17604 (0.04%)     | 93980 (0.19%)        | 0 (0.00%)       | 1604 (0.00%) |
| Th8           | 49510754       | 49381966 (99.74%)   | 19880 (0.04%)     | 107278 (0.22%)       | 0 (0.00%)       | 1630 (0.00%) |
| Th9           | 41641166       | 41549312 (99.78%)   | 17202 (0.04%)     | 72980 (0.18%)        | 0 (0.00%)       | 1672 (0.00%) |
| Th10          | 50783392       | 50666806 (99.77%)   | 15442 (0.03%)     | 100984 (0.20%)       | 0 (0.00%)       | 160 (0.00%)  |
| Th11          | 42764640       | 42666194 (99.77%)   | 16834 (0.04%)     | 79844 (0.19%)        | 0 (0.00%)       | 1768 (0.00%) |
| Th12          | 49234158       | 49125144 (99.78%)   | 18574 (0.04%)     | 88456 (0.18%)        | 0 (0.00%)       | 1984 (0.00%) |
| Th13          | 52239378       | 52129862 (99.79%)   | 14880 (0.03%)     | 93242 (0.18%)        | 0 (0.00%)       | 1394 (0.00%) |
| Th14          | 46151816       | 46051722 (99.78%)   | 14316 (0.03%)     | 84262 (0.18%)        | 0 (0.00%)       | 1516 (0.00%) |
| N2            | 44249462       | 44147832 (99.77%)   | 22396 (0.05%)     | 77442 (0.18%)        | 0 (0.00%)       | 1792 (0.00%) |
| N3            | 40172616       | 40101378 (99.82%)   | 11700 (0.03%)     | 57826 (0.14%)        | 0 (0.00%)       | 1712 (0.00%) |
| N4            | 47446602       | 47361862 (99.82%)   | 11574 (0.02%)     | 71458 (0.15%)        | 0 (0.00%)       | 1708 (0.00%) |
| N5            | 47509608       | 47425176 (99.82%)   | 12592 (0.03%)     | 70254 (0.15%)        | 0 (0.00%)       | 1586 (0.00%) |
| N6            | 47154318       | 47062864 (99.81%)   | 15354 (0.03%)     | 74538 (0.16%)        | 0 (0.00%)       | 1562 (0.00%) |
| N7            | 40852226       | 40773584 (99.81%)   | 13550 (0.03%)     | 63426 (0.16%)        | 0 (0.00%)       | 1666 (0.00%) |
| N8            | 53202306       | 53087908 (99.78%)   | 16950 (0.03%)     | 95996 (0.18%)        | 0 (0.00%)       | 1452 (0.00%) |

**Supplementary Table 2. Table of transcriptome data comparison reference statistics table.**

| <b>Sample</b> | <b>Total</b> | <b>Unmapped(%)</b> | <b>Unique_Mapped(%)</b> | <b>Multiple_Mapped(%)</b> | <b>Total_Mapped(%)</b> |
|---------------|--------------|--------------------|-------------------------|---------------------------|------------------------|
| Th1           | 49316178     | 1192760 (2.42%)    | 46786713 (94.87%)       | 1336705 (2.71%)           | 48123418 (97.58%)      |
| Th2           | 54484068     | 1539106 (2.82%)    | 51421781 (94.38%)       | 1523181 (2.80%)           | 52944962 (97.18%)      |
| Th3           | 39512696     | 1134702 (2.87%)    | 37355273 (94.54%)       | 1022721 (2.59%)           | 38377994 (97.13%)      |
| Th4           | 49564172     | 1434264 (2.89%)    | 45467523 (91.73%)       | 2662385 (5.37%)           | 48129908 (97.11%)      |
| Th6           | 39645906     | 1080551 (2.73%)    | 37507972 (94.61%)       | 1057383 (2.67%)           | 38565355 (97.27%)      |
| Th7           | 47612628     | 1366704 (2.87%)    | 44619278 (93.71%)       | 1626646 (3.42%)           | 46245924 (97.13%)      |
| Th8           | 48803368     | 1467442 (3.01%)    | 46079180 (94.42%)       | 1256746 (2.58%)           | 47335926 (96.99%)      |
| Th9           | 41023672     | 1122839 (2.74%)    | 38860892 (94.73%)       | 1039941 (2.53%)           | 39900833 (97.26%)      |
| Th10          | 48552004     | 1397544 (2.88%)    | 45777749 (94.29%)       | 1376711 (2.84%)           | 47154460 (97.12%)      |
| Th11          | 42289604     | 1276988 (3.02%)    | 39704597 (93.89%)       | 1308019 (3.09%)           | 41012616 (96.98%)      |
| Th12          | 47466072     | 1457269 (3.07%)    | 44642002 (94.05%)       | 1366801 (2.88%)           | 46008803 (96.93%)      |
| Th13          | 50973230     | 1472993 (2.89%)    | 47266662 (92.73%)       | 2233575 (4.38%)           | 49500237 (97.11%)      |
| Th14          | 44509112     | 1179953 (2.65%)    | 41900120 (94.14%)       | 1429039 (3.21%)           | 43329159 (97.35%)      |
| N2            | 43472084     | 1180433 (2.72%)    | 41033506 (94.39%)       | 1258145 (2.89%)           | 42291651 (97.28%)      |
| N3            | 39785296     | 1022730 (2.57%)    | 37570857 (94.43%)       | 1191709 (3.00%)           | 38762566 (97.43%)      |
| N4            | 46871142     | 1163005 (2.48%)    | 44295823 (94.51%)       | 1412314 (3.01%)           | 45708137 (97.52%)      |
| N5            | 46406672     | 1292575 (2.79%)    | 43923147 (94.65%)       | 1190950 (2.57%)           | 45114097 (97.21%)      |
| N6            | 46543924     | 1191423 (2.56%)    | 43894398 (94.31%)       | 1458103 (3.13%)           | 45352501 (97.44%)      |
| N7            | 40434784     | 1040819 (2.57%)    | 38290611 (94.70%)       | 1103354 (2.73%)           | 39393965 (97.43%)      |
| N8            | 52532404     | 1543542 (2.94%)    | 49433409 (94.10%)       | 1555453 (2.96%)           | 50988862 (97.06%)      |

**Supplementary Table 3. Table of methylation data filter.**

| <b>Sample</b> | <b>Clean reads num</b> | <b>HQ Clean reads num (%)</b> |
|---------------|------------------------|-------------------------------|
| Th1           | 655011516              | 643133678 (98.19%)            |
| Th2           | 578756378              | 571110174 (98.68%)            |
| Th3           | 591190230              | 581830674 (98.42%)            |
| Th4           | 633080368              | 621180388 (98.12%)            |
| Th5           | 623730348              | 620351826 (99.46%)            |
| Th6           | 633309176              | 618384592 (97.64%)            |
| Th7           | 611371898              | 597365680 (97.71%)            |
| Th8           | 602652242              | 589629610 (97.84%)            |
| Th9           | 620137130              | 609657726 (98.31%)            |
| Th10          | 617834478              | 613911016 (99.36%)            |
| Th11          | 589514406              | 580554920 (98.48%)            |
| Th12          | 597078888              | 586488056 (98.23%)            |
| Th13          | 594013150              | 587207694 (98.85%)            |
| N1            | 590001510              | 583815932 (98.95%)            |
| N2            | 653835408              | 641331770 (98.09%)            |
| N3            | 586415144              | 578223570 (98.6%)             |
| N4            | 581657012              | 573956604 (98.68%)            |
| N5            | 621917978              | 615017628 (98.89%)            |
| N6            | 648774992              | 636028996 (98.04%)            |
| N7            | 640678680              | 627502560 (97.94%)            |
| N8            | 583698310              | 575715568 (98.63%)            |
